# Supplementary material for: Immune tolerance in multiple sclerosis and neuromyelitis optica with peptide-loaded tolerogenic dendritic cells in a phase 1b trial
Source: PubMed Central journal article supplement — Proc Natl Acad Sci U S A. 2019 Apr 8;116(17):8463–70. doi: 10.1073/pnas.1820039116 (PMC6486735; doi:10.1073/pnas.1820039116), 2019-04-08
Supplement: pnas.1820039116.sapp.pdf [file pnas.1820039116.sapp.pdf]

## Supplementary Information for

### **Immune Tolerance in Multiple Sclerosis and Neuromyelitis Optica by Peptide-Loaded Tolerogenic Dendritic Cells in a Phase 1b Trial.**

Irati Zubizarreta<sup>1#</sup>, Georgina Flórez-Grau<sup>2#</sup>, Gemma Vila<sup>1</sup>, Raquel Cabezón<sup>2</sup>, Carolina España<sup>2</sup>, Magi Andorra<sup>1</sup>, Albert Saiz<sup>1,3</sup>, Sara Llufríu<sup>1,3</sup>, Maria Sepulveda<sup>1,3</sup>, Nuria Solà-Valls<sup>1,3</sup>, Elena H Martínez-Lapiscina<sup>1,3</sup>, Irene Pulido-Valdeolivas<sup>1</sup>, Bonaventura Casanova<sup>4</sup>, Marisa Martínez Gines<sup>5</sup>, Nieves Tellez<sup>6</sup>, Celia Oreja-Guevara<sup>7</sup>, Marta Español<sup>2</sup>, Esteve Trias<sup>8</sup>, Joan Cid<sup>9</sup>, Manel Juan<sup>2</sup>, Miquel Lozano<sup>9</sup>, Yolanda Blanco<sup>1,3</sup>, Lawrence Steinman<sup>10</sup>, Daniel Benitez-Ribas<sup>2\*</sup>, Pablo Villoslada<sup>1\*</sup>.

<sup>1</sup>Center of Neuroimmunology, Institut d'Investigacions Biomediques August Pi Sunyer (IDIBAPS), Barcelona, Spain; <sup>2</sup>Department of Immunology, Hospital Clinic, Barcelona, Spain; <sup>3</sup>Service of Neurology, Hospital Clinic, University of Barcelona, Barcelona, Spain; <sup>4</sup>Hospital La Fe, Valencia, Spain; <sup>5</sup>Hospital Gregorio Marañón, Madrid, Spain; <sup>6</sup>Hospital de Valladolid, Valladolid, Spain; <sup>7</sup>Hospital Clinico San Carlos, Madrid, Spain; <sup>8</sup>Advanced

Therapies Unit, Hospital Clinic, Barcelona and BST; <sup>9</sup>Apheresis Unit, Department of Hemotherapy and Hemostasis, Hospital Clinic, Barcelona, Spain; <sup>10</sup>Stanford University, US.

# both authors contributed as first author

Paste corresponding author name here  
Email: pvilloslada@clinic.ub.es

**This PDF file includes:**

Supplementary text  
Figs. S1 to S2  
Tables S1 to S4

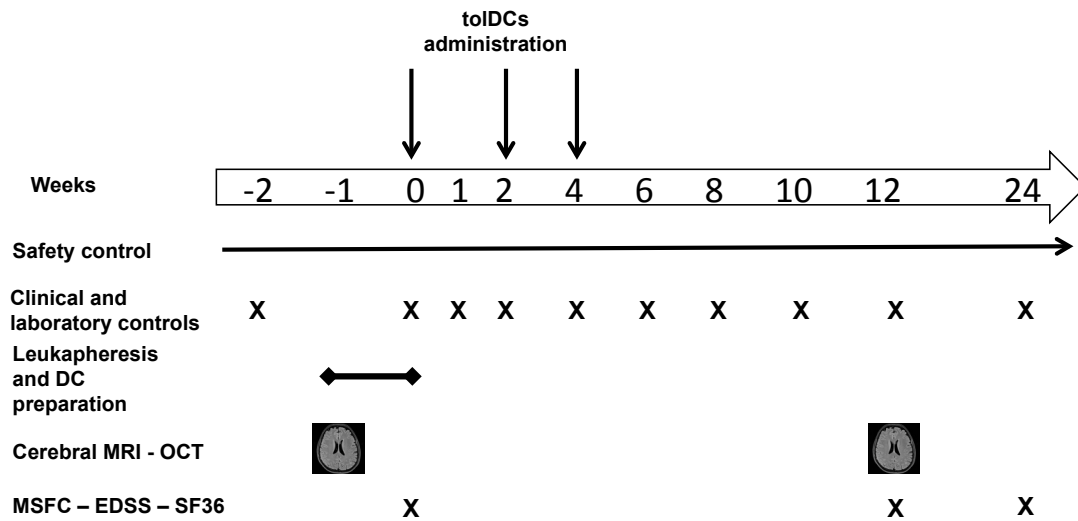

**Figure S1: Clinical trial design of toIDC therapy in patients with MS and NMO.** Patients were screening for inclusion and exclusion criteria as well for MRI disease activity and blood test 2 weeks before onset of therapy and white cells were collected by leukapheresis for toIDC preparation. On day 0 (baseline visit) patients performed the clinical visit, including disability scales (EDSS and MSFC) and received the first dose of toIDC (representing 1/3 of the total dose). Patients received the second dose 2 weeks later and the third dose on week 4 of the trial. Patients were followed until week 12 for efficacy and immunological assessments and until week 24 for safety assessment (extension safety assessments were performed by month 12, 18 and 24 if available). Brain MRI and OCT were conducted during the screening and by week 12. Blood samples were collected weekly for the first two weeks, every 2 weeks until week 12.

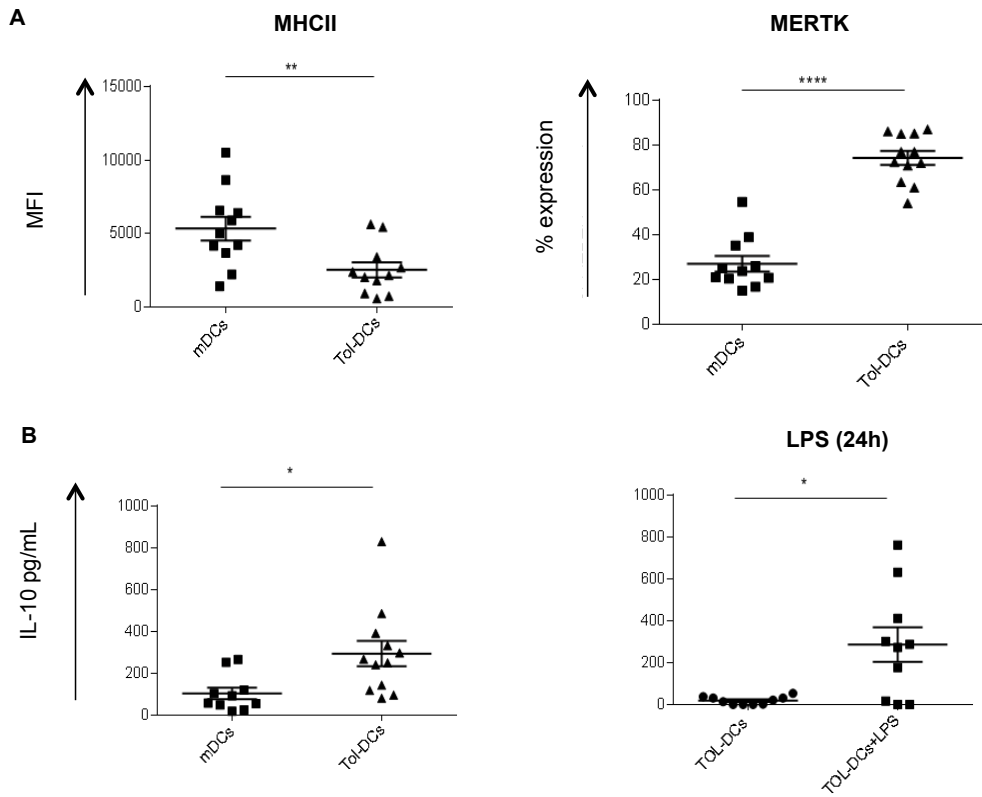

**Figure S2: TolDCs characterization and stability.** Clinical grade produced tolDCs from each patient were characterized assessing for their phenotype, cytokine production, and immunogenicity. A) semi-mature phenotype of tolDCs as shown by the lower expression of MHCII and increased expression of the glucocorticoid-induced receptor MERTK compared to mature DCs. B) clinical grade generated tolDCs produced higher amounts of the IL-10 at baseline and after LPS challenge compared to mature DCs.

**Table S1. Peptides and sequence**

| <b>Peptide</b> | <b>Sequence</b> | <b>Aminoacids sequence</b> |
|----------------|-----------------|----------------------------|
| MBP1           | MBP 13-32       | KYLATASTMDHARHGFLPRH       |
| MBP2           | MBP 83-99       | ENPVVHFFKNIVTPRTP          |
| MBP3           | MBP 11-129      | LSRFSWGAEGQRPGFGYGG        |
| MBP4           | MBP 146-170     | AQGTLISKIFLGGRDSRSGSPMARR  |
| MOG1           | MOG 1-20        | GQFRVIGPRHPIRALVGDEV       |
| MOG2           | MOG 35-55       | MEVGWYRPPFSRVVHLYRNGK      |
| PLP1           | PLP 139-154     | HCLGKWLGHDPDKFVGI          |
| AQP4           | AQP4 63-76      | EKPLPVDMVLISLC             |

**Table S2. Panel for flow cytometry and antibodies**

1. **lymphocyte subpopulations:** CD3 – CD4 – CD8 – CD19
  - CD3 (FITC) – BD 345763
  - CD4 (PE Cy7) – BD 560649
  - CD8 (APC) - BD 555369
  - CD19 (PerCP-C5.5) – BD 332780
2. **Monocyte and NK cells subpopulations:** CD3 – CD56 – CD14
  - CD3 (FITC) – BD 345763
  - CD14 (PE Cy7) – BD 557742
  - CD56 (APC-Cy7) - BioLegend 318332
3. **T-cytotoxic and NK cell populations:** CD4 - CD8 – CD56 – CD161
  - CD4 (PE Cy7) – BD 560649
  - CD8 (APC) - BD 555369
  - CD56 (APC-Cy7) - BioLegend 318332
  - CD161 (PerCP-Cy5.5) – BioLegend 339908
4. **Treg subpopulations:** CD4 – CD25high – FoxP3 – IL10
  - CD4 (PE Cy7) – BD 560649
  - IL-10 (PE) – BD 559330
  - FoxP3 (Alexa Fluor 647/APC) – BD 560045
  - CD25 (PerCP) - Biolegend 356112
5. **T-helper subpopulations:** CD4 – IFNgamma – IL4 – IL17
  - CD4 (PE Cy7) – BD 560649
  - IFN gamma (PE) – BD 340452
  - IL-17 (PerCP 5.5) – BD 560799
  - IL-4 (APC) – BD 554486
6. **Encephalitogenic T cells expressing GM-CSF:** CD4 – CD8 – GM-CSF
  - CD4 (PE Cy7) – BD 560649
  - CD8 (APC) - BD 555369
  - GM CSF (PE) – BD 554507
7. **T cells: naive, central memory, effector and effector memory cells**
  - Viability (FITC) - - L34969
  - CD3 (V450) – BD 560365
  - CD4 (PerCP Cy5.5) – BD 552838
  - CD8 (V500) – BD 560774
  - CCR7 (PE) – MILTENYI 130-099-362
  - CD45RA (PE Cy7) – BD 561216
  - CD45RO (APC) – BD 559865
  - ICOS (APC Cy7) - BD 313529

|                        |                                 |
|------------------------|---------------------------------|
| <b>Naïve</b>           | CD3+CD4/8+ CCR7+ CD45RA+CD45RO- |
| <b>Central memory</b>  | CD3+CD4/8+ CCR7+ CD45RA-CD45RO+ |
| <b>Effector</b>        | CD3+CD4/8+ CCR7- CD45RA+CD45RO- |
| <b>Effector memory</b> | CD3+CD4/8+ CCR7- CD45RA-CD45RO+ |

**Table S3. Retina thickness by Optical Coherent Tomography at baseline and week 12.** Results are expressed in  $\mu\text{m}$ . NA refers to lack of valid measurements fulfilling OSCAR-IB criteria because presence of nistagmus, severe vision loss or concomitant ophthalmologic diseases.

| ID           | Baseline |      |     |     | Week 12 |      |     |     |
|--------------|----------|------|-----|-----|---------|------|-----|-----|
|              | RNFL     | RNFL | MV  | MV  | RNFL    | RNFL | MV  | MV  |
|              | OD       | OS   | OD  | OS  | OD      | OS   | OD  | OS  |
| <b>MS01</b>  | 78       | 73   | 263 | 259 | 78      | 73   | 267 | 261 |
| <b>MS02</b>  | 96       | 91   | 276 | 272 | 96      | 92   | 278 | 271 |
| <b>MS03</b>  | NA       | NA   | NA  | NA  | NA      | NA   | NA  | NA  |
| <b>MS04</b>  | 105      | 103  | 267 | 267 | 106     | 104  | 267 | 265 |
| <b>MS05</b>  | 69       | 81   | 269 | 274 | 69      | 80   | 273 | 275 |
| <b>MS06</b>  | 98       | 96   | 292 | 292 | 99      | 97   | 290 | 286 |
| <b>MS07</b>  | 115      | 111  | 262 | 275 | 114     | 110  | 263 | 273 |
| <b>MS08</b>  | 62       | 52   | 289 | 287 | 65      | 53   | 290 | 288 |
| <b>NMO01</b> | 78       | 91   | 278 | 280 | 78      | 89   | 276 | 283 |
| <b>NMO02</b> | 42       | NA   | 244 | NA  | NA      | NA   | NA  | NA  |
| <b>NMO03</b> | NA       | NA   | NA  | NA  | NA      | NA   | NA  | NA  |
| <b>NMO04</b> | 43       | 47   | 232 | 228 | NA      | NA   | NA  | NA  |

## References

1. Neuhaus J-M, Sitcher L, Meins F, Jr, Boller T (1991) A short C-terminal sequence is necessary and sufficient for the targeting of chitinases to the plant vacuole. *Proc Natl Acad Sci USA* 88:10362–10366.
2. van Sebille E, Doblin M (2016) Data from “Drift in ocean currents impacts intergenerational microbial exposure to temperature.” Figshare. <https://dx.doi.org/10.6084/m9.figshare.3178534.v2>.
3. Hill AVS (1991) HLA associations with malaria in Africa: Some implications for MHC evolution. *Molecular Evolution of the Major Histocompatibility Complex*, eds Klein J, Klein D (Springer, Heidelberg), pp 403–420.
